# Supplementary material for: Higher education in Gerodontology in European Universities
Source: Springer Nature journal article supplement (doi:10.1186/s12903-017-0362-9), 2017-03-28
Supplement: MOESM1 [file 12183054]

## **Additional file 1**

### **Survey questionnaire for the current status of Gerodontology education in Europe**

(pdf format of the electronic questionnaire developed by A. Kossioni et al.)

#### **GENERAL INFORMATION**

1. **Full name of the University / Dental School**
2. **Country**
3. **Name, position and email address of the dental school's contact person**
4. **Telephone of the dental school's contact person**
5. **Website of the dental school**
6. **How many years is the duration of the undergraduate dental studies at your dental school?**
  - Four years
  - Five years
  - Six years
  - Other (please explain)....
7. **Is your dental school public or private?**
  - Public
  - Private
  - Other (please explain)....
8. **Official teaching language at your dental school ....**
9. **How many dental schools are there in your country?**
10. **Is Gerodontology a recognized specialty in your country?**
  - Yes
  - No
  - Don't know
  - Other (please explain)....
11. **Are there any dentists specialising in Gerodontology in your country?**
  - Yes
  - No
  - Don't know
  - Other (please explain)....
12. **Is there a Gerodontology Scientific Association in your country?**
  - Yes
  - No
  - Don't know
  - Other (please explain)....

*If yes,*

13. **If you can, please provide the name of the Gerodontology Association in your country**
14. **If you can, please provide the web address of the Gerodontology Association in your country**

#### **UNDERGRADUATE GERODONTOLOGY TEACHING**

15. **Is Gerodontology being taught at the undergraduate studies?**

- Yes
- No
- Other (please explain)....

*If no,*

16. **Do you consider starting undergraduate Gerodontology teaching soon?**

- Yes
- No
- Don't know
- Other (please explain)....

17. **Is there a specific Gerodontology Department/Division/Unit at your dental school?**

- Yes
- No
- Other (please explain)....

*If yes,*

18. **Please type the name of the Gerodontology Department/Division/Unit in your own language**

19. **Please type the name of the Gerodontology Department/Division/Unit in English**

20. **Which is the Department/Division/Unit of the Programme Director?**

- Gerodontology
- Special Care Dentistry
- Prosthodontics
- Preventive and Community Dentistry
- Other (please explain)....

21. **What is the formal training of the Gerodontology Programme Director?**

- Gerodontology
- Special Care Dentistry
- Prosthodontics
- Preventive and Community Dentistry
- Other (please explain)....

22. **Is Gerodontology an elective or a compulsory (required) course according to your curriculum?**
- Elective
  - Compulsory (required)
  - Only some parts of the course are compulsory (ie. the theoretical component).
23. **If only some parts of the course are compulsory, please offer more details....**
24. **How many years is Gerodontology taught at the undergraduate curriculum at your dental school? ...**
25. **Is Gerodontology taught as an independent course?**
- Yes
  - No
  - Other (please explain)....
26. **Is Gerodontology teaching integrated in other disciplines' courses?**
- Yes
  - No
  - Other (please explain)....
- If yes,*
27. **Which discipline(s) include Gerodontology teaching?**
- Prosthodontics
  - Preventive and Community Dentistry
  - Special Care Dentistry
  - Operative Dentistry
  - Periodontology
  - Oral and Maxillofacial Surgery
  - Oral Pathology
  - Endodontics
  - Other (please explain)....
28. **What is the composition of the Gerodontology Educators?**
- Dentists
  - Physicians
  - Nurses
  - Psychologists
  - Social workers
  - Other (please explain)....

29. **What are the teaching disciplines of the Dental Educators in the Gerodontology course?**

- Gerodontology
- Prosthodontics
- Special Care Dentistry
- Preventive and Community Dentistry
- Operative Dentistry
- Periodontology
- Oral and Maxillofacial Surgery
- Endodontics
- Other (please explain)....

30. **In which semester(s) is Gerodontology taught? (If your school offers an introductory year, then the 1<sup>st</sup> semester is the one officially starting the dental studies)**

- 1st semester
- 2nd semester
- 3rd semester
- 4th semester
- 5th semester
- 6th semester
- 7th semester
- 8th semester
- 9th semester
- 10th semester
- 11<sup>th</sup> semester
- 12<sup>th</sup> semester
- Other (please explain)....

31. **Does Gerodontology teaching have a theoretical component?**

- Yes
- No
- Other (please explain)....

**32. How is theoretical training delivered?**

- Lectures
- Small group seminars
- Problem-based teaching
- Occasional lectures throughout the curriculum
- Information embedded in other courses' lectures and seminars
- E-learning
- Blended learning (e-learning + face to face teaching)
- Research projects
- Other (please explain)....

**33. What are the theoretical topics in Gerodontology teaching at your school?**

- Demographics
- Barriers to oral care
- Biology, physiology, psychology of ageing
- Medical problems in old age
- Pharmacology and polypharmacy in old age
- Association between general and oral health in the elderly population
- Epidemiology of oral health in the elderly population
- Age-changes of the orofacial system
- Communication skills
- Nutritional/chewing problems in old age
- Interdisciplinary (interprofessional) management of the ageing individual
- Legal issues (ie. ability to consent)
- Ethical aspects
- Recording history
- Risk assessment in the ageing individual
- Salivary impairment/ xerostomia
- Periodontal disease in old age
- Denture related conditions and prosthodontic management in old age
- Caries risk assessment, particularly root caries
- Tooth wear assessment
- Endodontic assessment
- Oral mucosal diseases in old age
- Patient centered oral health care planning

- Appropriate management of oral and dental conditions for each patient according to the individual needs and demands
- Management of people with compromised health and various levels of dependency
- Principles and practice of domiciliary care
- Principles and practice of palliative care
- Oral health education on an individual and community based level
- Other (please explain)....

**34. Does Gerodontology teaching have a pre-clinical component?**

- Yes
- No
- Other (please explain)....

**35. If your undergraduate Gerodontology curriculum includes a pre-clinical component, please specify....**

**36. Does Gerodontology teaching have a clinical component?**

- Yes
- No
- Other (please explain)....

*If, yes:*

**37. Is clinical training compulsory or elective?**

- Compulsory
- Elective
- Other (please explain)....

**38. Where is clinical Gerodontology training delivered?**

- In the Dental School, in a dedicated Gerodontology clinic
- In the Dental School, embedded in other disciplines' clinics
- In Geriatric Hospitals
- In Nursing homes
- In Older people Day Centers
- In patients' houses after house calls (Domiciliary Care)
- In Community clinics
- In Mobile units
- Other (please explain)....

**39. What is the content of Gerodontology clinical training?**

- Oral health care plan
- Dentures assessment, repairs and/or fabrication
- Fixed Prosthodontics provision
- Oral health prevention and education
- Caries management
- Endodontic treatment
- Periodontal treatment
- Dental implants provision
- Teeth extractions
- Follow-up and recall
- Other (please explain)....

**40. Are you familiar with the European College of Gerodontology (ECG) undergraduate curriculum guidelines (Gerodontology 2009;26(3):165-71)?**

- Yes
- No
- Other (please explain)....

**41. What type of educational material do you use in Gerodontology teaching?**

- PowerPoint Presentations
- Video display
- E-learning material
- Portfolio
- Webinars
- Lecture Notes
- Printed Textbooks
- E-Books
- Scientific Articles
- Other (please explain)....

**POSTGRADUATE GERODONTOLOGY TEACHING**

**42. Is Gerodontology being taught in the postgraduate curriculum at your dental school?**

- Yes
- No
- Other (please explain)....

*If no*

**43. Do you consider starting Gerodontology teaching at the postgraduate curriculum soon?**

- Yes
- No
- Don't know
- Other (please explain)....

**44. Is there a dedicated Gerodontology postgraduate course offered at your dental school?**

- Yes
- No
- Other (please explain)....

**45. Is postgraduate training in Gerodontology offered at your dental school embedded in other postgraduate courses?**

- Yes
- No
- Other (please explain)....

*If yes,*

**46. If Gerodontology is embedded in other postgraduate courses, please specify:**

- Prosthodontics
- Special Care Dentistry
- Preventive and Community Dentistry
- Operative Dentistry
- Periodontology
- Oral Pathology
- Oral and Maxillofacial Surgery
- Endodontics
- Other (please explain)....

**47. Do you run any Continuing Education Courses in Gerodontology at your dental school?**

- Yes
- No
- Other (please explain)....



## **GERODONTOLOGY EDUCATIONAL MATERIAL**

**48. Is there any Gerodontology educational material developed and published in your country (eg. textbooks, lecture notes, e-learning material etc)?**

- Yes
- No
- Don't know
- Other (please explain)....

**49. If you wish, please add more details about the Gerodontology educational material published in your country...**

## **ADDITIONAL DETAILS**

**50. Please provide your role and title (Head/Faculty/Administration, etc) ....**

**51. If you wish, please add any additional thoughts or comments on the questionnaire.....**

**52. If you wish, please provide the name, title and email address of the Faculty/Educator responsible for Gerodontology teaching at your dental school to facilitate communication with the European College of Gerodontology.....**

**Many thanks for taking the time to complete this questionnaire**
